# Supplementary material for: Pentamethylquercetin Regulates Lipid Metabolism by Modulating Skeletal Muscle-Adipose Tissue Crosstalk in Obese Mice
Source: MDPI journal article supplement (doi:10.3390/pharmaceutics14061159), 2022-05-29
Supplement: s1 [file s1]

**Table S1** primer sequence

| Gene name                       | Forward primer sequence (F) | Reverse primer sequence (R) |
|---------------------------------|-----------------------------|-----------------------------|
| <i>Ucp-1</i>                    | AGGCTTCCAGTACCATTAGGT       | CTGAGTGAGGCAAAGCTGATTT      |
| <i>Pgc-1<math>\alpha</math></i> | GGAGCTGGATGGCTTGGGACAT      | TTCGCAGGCTCATTGTTGTACTGGT   |
| <i>Cox-7a1</i>                  | GCTCTGGTCCGGTCTTTTAGC       | GTACTGGGAGGTCATTGTCGG       |
| <i>Cidea</i>                    | TGACATTCATGGGATTGCAGAC      | GGCCAGTTGTGATGACTAAGAC      |
| <i>Cd137</i>                    | CGTGCAGAACTCCTGTGATAAC      | GTCCACCTATGCTGGAGAAGG       |
| <i>Tmem26</i>                   | ACCCTGTCATCCCACAGAG         | TGTTTGGTGGAGTCCTAAGGTC      |
| <i>Tbx-1</i>                    | GGCAGGCAGACGAATGTTC         | TTGTCATCTACGGGCACAAAG       |
| <i>Fndc5</i>                    | ATGAAGGAGATGGGGAGGAA        | GCGGCAGAAGAGAGCTATAACA      |
| <i>Gapdh</i>                    | GACAAAATGGTGAAGGTCGGTG      | TGATGTTAGTGGGGTCTCGCTC      |

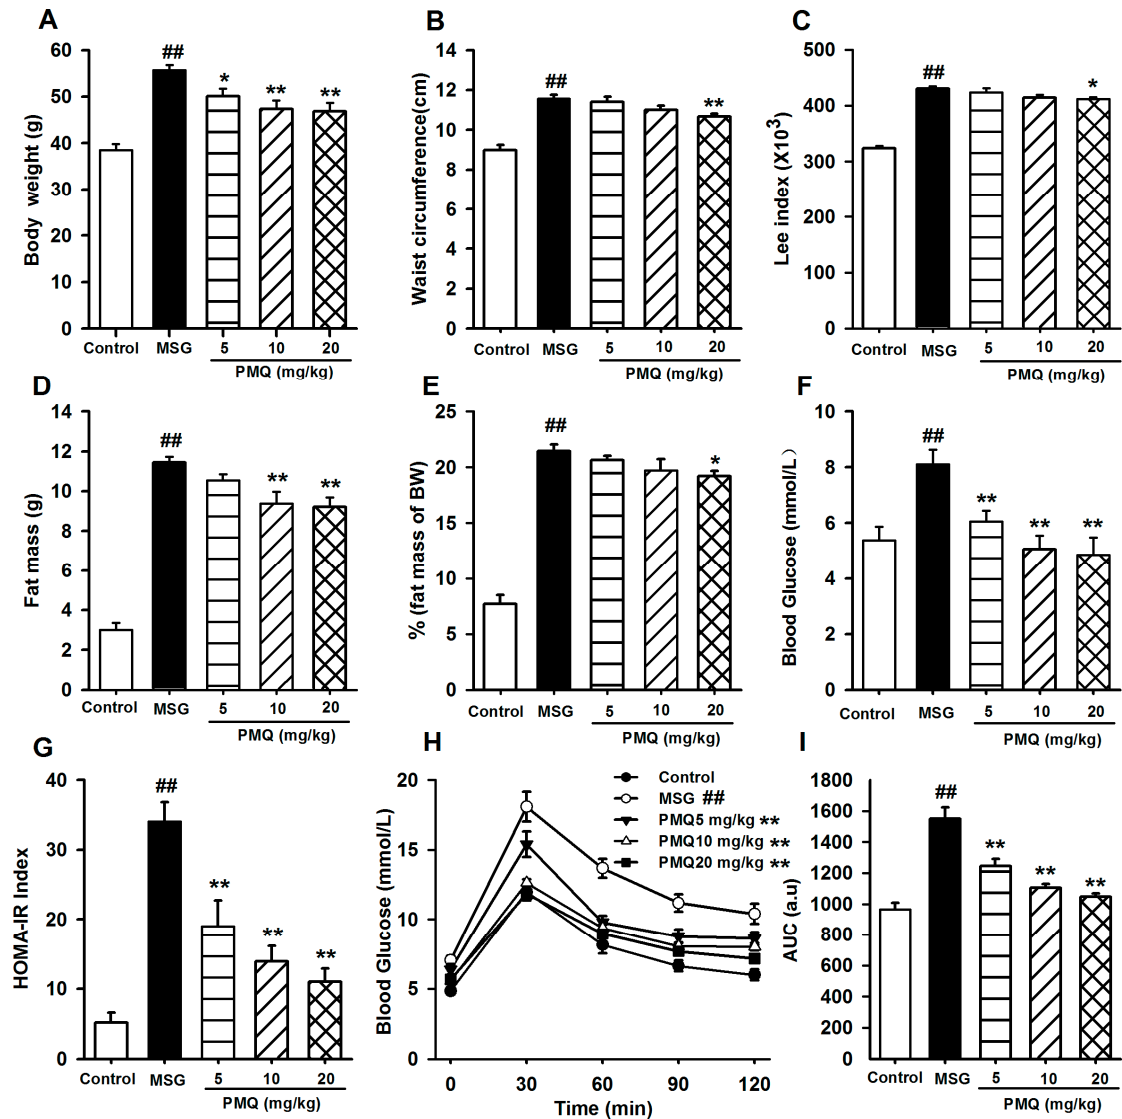

**Figure S1 PMQ reduces obesity and improves insulin sensitivity.** Vehicle or PMQ were administered orally to 5-week-old CD-1 or MSG-induced obese mice for 19 weeks, and body weight (A), waist circumference (B), Lee index (C), fat mass (D), fat mass percentage (E), blood glucose (F), HOMA-IR index (G), OGTT (H) and AUC (I) levels were determined. <sup>##</sup> $P < 0.01$  vs control group;  $*p < 0.05$ ,  $**p < 0.01$  vs MSG group. Data are expressed as means  $\pm$  SEM,  $n = 8-10$ .

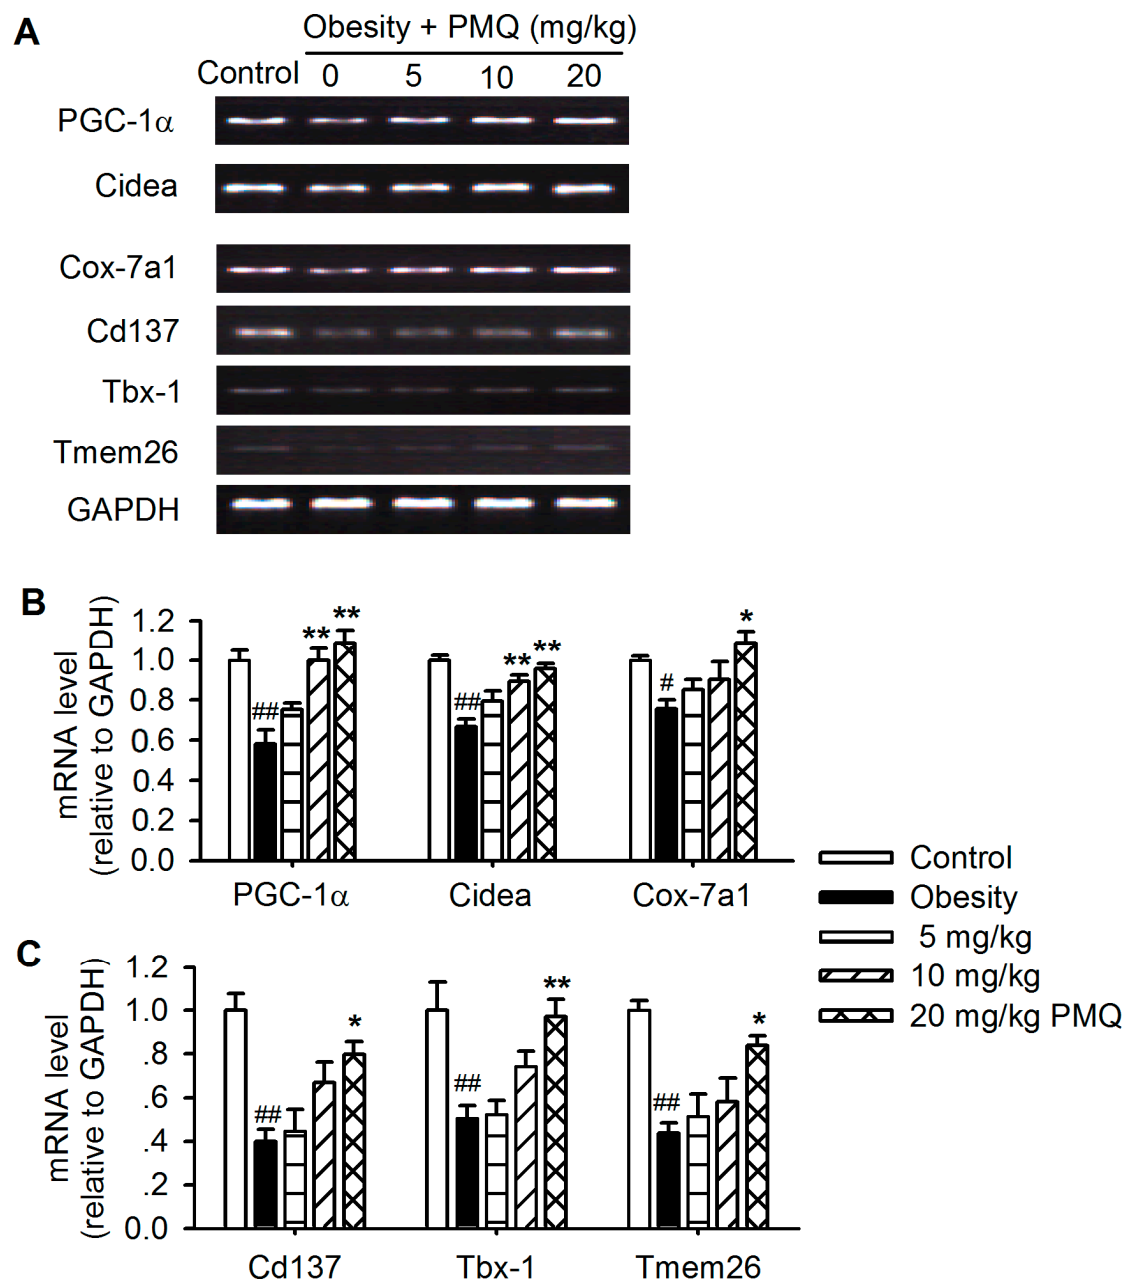

**Figure S2. PMQ promotes the browning of inguinal WAT in MSG mice.** (A) Representative PCR bands of brown-fat specific genes and beige cell markers in the inguinal depots. Each mRNA measurement was normalized to GAPDH (B, C).  $\#p < 0.05$ ,  $\##p < 0.01$  vs control group;  $*p < 0.05$ ,  $**p < 0.01$  vs MSG group. Data are expressed as means  $\pm$  SEM,  $n = 4$ .

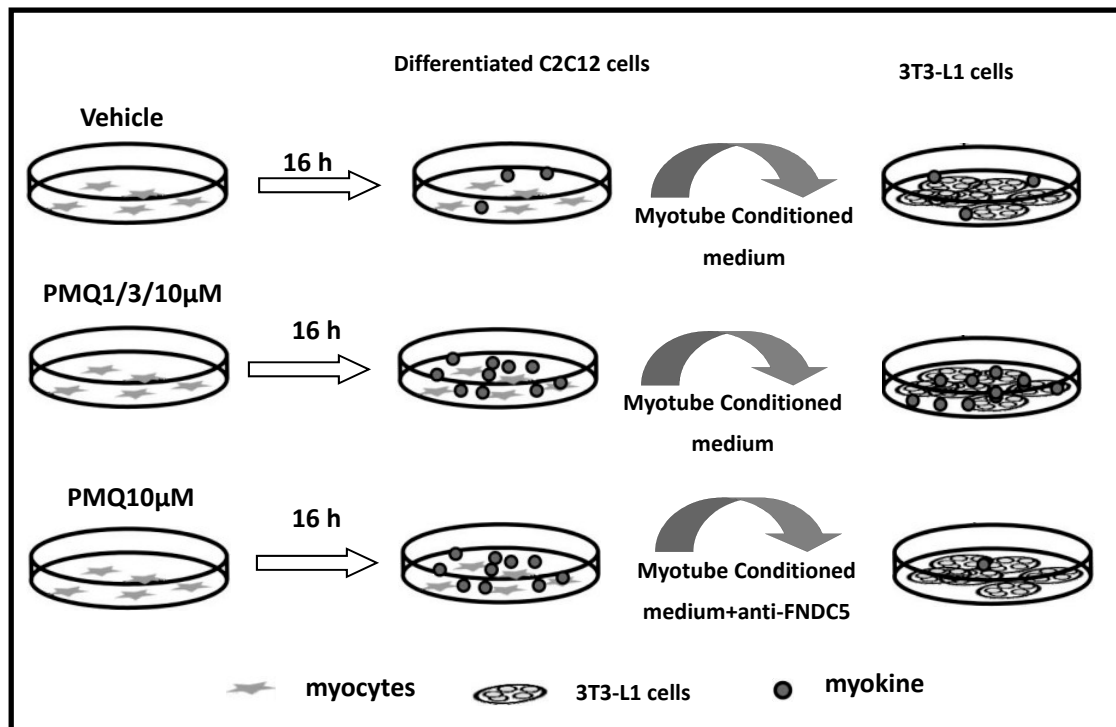

**Figure S3. Experimental scheme for myotube-conditioned media treatment on 3T3-L1 adipocytes.** Differentiated C2C12 cells were incubated with PMQ (1, 3, 10 µM) or vehicle for 16 h. Then the 24 h myotube-conditioned media were collected and filtered. Thereafter, the conditioned media were transferred to differentiation medium of 3T3-L1 adipocytes for 8 days until adipocytes matured.

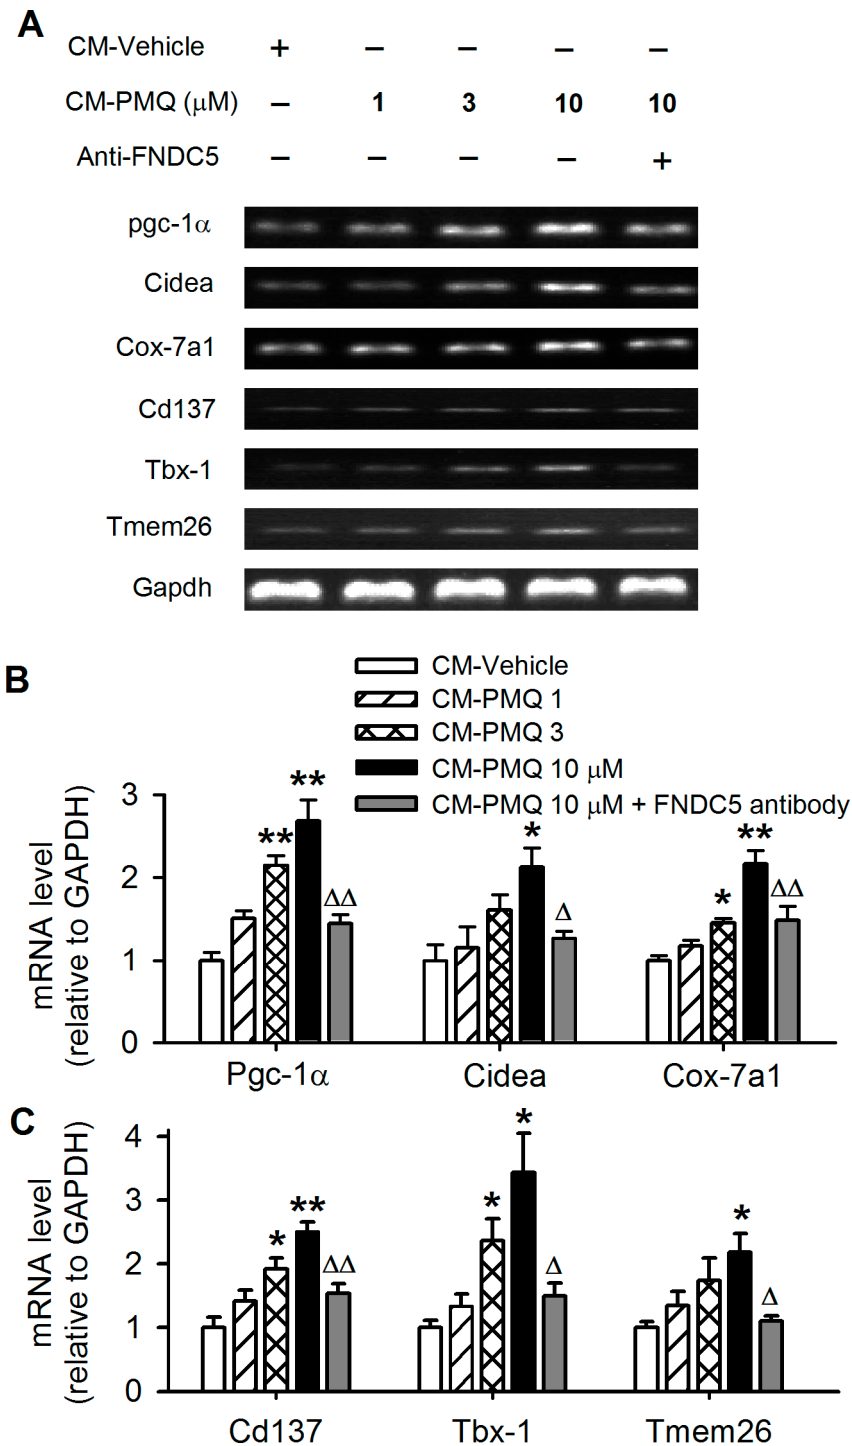

**Figure S4. Conditioned media from PMQ-treated myotubes induce brown-like transition in 3T3-L1 cells.** 3T3-L1 cells were treated with CM-vehicle, CM-PMQ (1, 3, 10) and CM-PMQ10 plus FNDC5 antibody (anti-FNDC5). (A) Representative PCR bands of brown-fat specific genes and beige cell markers in the inguinal depots. Each mRNA measurement was normalized to GAPDH (B, C).  $n = 3$ .  $*p < 0.05$ ,  $**p < 0.01$  vs MCM-vehicle;  $\Delta P < 0.05$ ,  $\Delta\Delta P < 0.01$  vs MCM-PMQ10. Data are expressed as means  $\pm$  SEM.
